# Supplementary material
Source: PubMed Central journal article supplement (PMC528762)
Supplement: pnas_101_45_16022__1.pdf [file pnas_101_45_16022__1.pdf]

**Table 2. Initial expression of normal tissue-specific genes in M1-t-p53 myeloid leukemic cells.**

**Skeletal muscle, heart, brown fat**

(Cluster a)  
size: 40

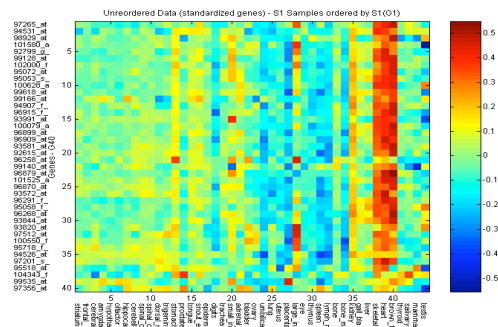

| Probeset ID | Gene symbol | Gene title    | Accession no. |
|-------------|-------------|---------------|---------------|
| 1           | 100079_at   | Ndufb9        | A1845556      |
| 2           | 100550_f_at | Cox6c         | AW060422      |
| 3           | 100628_at   | ---           | A1840263      |
| 4           | 101525_at   | Ndufb10       | A1848871      |
| 5           | 101580_at   | Cox7b         | A1851220      |
| 6           | 102000_f_at | Uqcrc2        | A1842835      |
| 7           | 104343_f_at | Pla2g12a      | A1845798      |
| 8           | 92615_at    | ---           | A1853615      |
| 9           | 92799_g_at  | Atp5c1        | AA870675      |
| 10          | 93572_at    | Ndufs1        | A1835051      |
| 11          | 93581_at    | Ndufb8        | A1845121      |
| 12          | 93820_at    | Cox7a2        | AF037371      |
| 13          | 93844_at    | 1500040F11Rik | AW061302      |
| 14          | 93991_at    | Mdh2          | X07295        |
| 15          | 94526_at    | D10Erd214e    | A1848453      |
| 16          | 94531_at    | 2310005O14Rik | AW124582      |
| 17          | 94907_f_at  | 1110001J03Rik | AW045632      |
| 18          | 95053_s_at  | Sdhb          | AA674669      |
| 19          | 95058_f_at  | 2610205H19Rik | AW121984      |
| 20          | 95072_at    | Cyc1          | AW121892      |
| 21          | 95518_at    | 1810015C04Rik | AW122893      |
| 22          | 95718_f_at  | Usmg5         | AW060158      |
| 23          | 96258_at    | Mgst3         | A1843448      |
| 24          | 96268_at    | Sucg1         | A1840979      |
| 25          | 96291_f_at  | BC059730      | A1835847      |
| 26          | 96870_at    | Aco2          | A1836740      |
| 27          | 96879_at    | Ogdh          | A1852338      |
| 28          | 96899_at    | Ndufs3        | AW123802      |
| 29          | 96909_at    | Ndufab1       | A1849803      |
| 30          | 96915_f_at  | Ndufa3        | AA879764      |
| 31          | 97201_s_at  | Ndufa5        | AA823381      |
| 32          | 97265_at    | 1810013D10Rik | A1835060      |
| 33          | 97356_at    | 1810008O21Rik | A1839653      |
| 34          | 97512_at    | 2010107E04Rik | AW226650      |
| 35          | 98929_at    | Mrps36        | A1846452r     |
| 36          | 99128_at    | Atp5o         | A1849767      |
| 37          | 99140_at    | Mrpl16        | AW124920      |
| 38          | 99166_at    | 0610012G03Rik | A1845963      |
| 39          | 99535_at    | Ccrn4l        | A1845963      |
| 40          | 99618_at    | Uqcr          | A1845963      |

**Neuronal tissues**

(Cluster b)  
size: 58

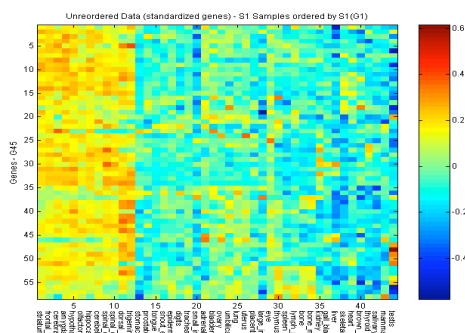

| Probeset ID | Gene symbol | Gene title    | Accession no.                                                                                                                                                                      |          |
|-------------|-------------|---------------|------------------------------------------------------------------------------------------------------------------------------------------------------------------------------------|----------|
| 1           | 94073_at    | Polr2g        | Polymerase (RNA) II (DNA directed) polypeptide G                                                                                                                                   | A1836182 |
| 2           | 93293_at    | Calmod2       | Calmodulin 2                                                                                                                                                                       | M27844   |
| 3           | 99191_at    | Cri1          | CREBBP/EP300 inhibitory protein 1                                                                                                                                                  | A1844939 |
| 4           | 97358_at    | Lphn1         | Latrophilin 1                                                                                                                                                                      | A1851356 |
| 5           | 99179_at    | Cuedc2        | CUE domain containing 2                                                                                                                                                            | A1846233 |
| 6           | 93116_at    | Prkacb        | Protein kinase, cAMP dependent, catalytic, beta                                                                                                                                    | J02626   |
| 7           | 96850_at    | Eif4g3        | Eukaryotic translation initiation factor 4 gamma, 3                                                                                                                                | A1853642 |
| 8           | 102009_at   | Cyfp2         | Cytoplasmic FMR1 interacting protein 2                                                                                                                                             | A1835274 |
| 9           | 93043_at    | Sdfr1         | Stromal cell derived factor receptor 1                                                                                                                                             | D50463   |
| 10          | 99633_at    | Ncdn          | Neurochondrin                                                                                                                                                                      | AB017608 |
| 11          | 96852_at    | Prkar1a       | Protein kinase, cAMP dependent regulatory, type I, alpha                                                                                                                           | AW122197 |
| 12          | 95716_at    | Ywhag         | 3-monoxygenase/tryptophan 5-monoxygenase activation protein, gamma                                                                                                                 | AW125041 |
| 13          | 102252_at   | Pfdn2         | Polypeptide prefoldin 2                                                                                                                                                            | Y17393   |
| 14          | 96299_at    | ---           | 13 days embryo forelimb cDNA, RIKEN full-length enriched library, clone:5930433F13 product:unknown EST, full insert sequence                                                       | A1847298 |
| 15          | 101929_at   | 6720463E02Rik | RIKEN cDNA 6720463E02 gene                                                                                                                                                         | A1836322 |
| 16          | 103504_at   | Ssbp2         | Single-stranded DNA binding protein 2                                                                                                                                              | A1837107 |
| 17          | 98887_at    | Napa          | N-ethylmaleimide sensitive fusion protein attachment protein alpha                                                                                                                 | AW125607 |
| 18          | 93271_s_at  | Gnas          | GNAS (guanine nucleotide binding protein, alpha stimulating) complex locus                                                                                                         | AJ245401 |
| 19          | 97484_at    | Zmynd11       | Zinc finger, MYND domain containing 11                                                                                                                                             | A1852704 |
| 20          | 103032_at   | Tpst1         | Protein-tyrosine sulfotransferase 1                                                                                                                                                | AF038008 |
| 21          | 96924_at    | 9430077D24Rik | RIKEN cDNA 9430077D24 gene                                                                                                                                                         | A1849719 |
| 22          | 96295_at    | Psat1         | Phosphoserine aminotransferase 1                                                                                                                                                   | AW122030 |
| 23          | 98122_at    | Lmo4          | LIM domain only 4                                                                                                                                                                  | AF074600 |
| 24          | 100026_at   | Bcat1         | Branched chain aminotransferase 1, cytosolic                                                                                                                                       | U42443   |
| 25          | 97458_at    | Gnb1          | Guanine nucleotide binding protein, beta 1                                                                                                                                         | A1845935 |
| 26          | 93063_at    | App           | Amyloid beta (A4) precursor protein                                                                                                                                                | U82624   |
| 27          | 96187_at    | Pkp4          | Plakophilin 4                                                                                                                                                                      | A1837021 |
| 28          | 95340_at    | Mt3           | Metallothionein 3                                                                                                                                                                  | M93310   |
| 29          | 95746_at    | Atp6v1a1      | ATPase, H+ transporting, V1 subunit A, isoform 1                                                                                                                                   | AW123765 |
| 30          | 96948_at    | Qdpr          | Quinoid dihydropteridine reductase                                                                                                                                                 | A1845337 |
| 31          | 99087_at    | D10ErtD749e   | DNA segment, Chr 10, ERATO Doi 749, expressed                                                                                                                                      | AW060179 |
| 32          | 93011_at    | Gabarapl1     | Gamma-aminobutyric acid (GABA(A)) receptor-associated protein-like 1                                                                                                               | AW123904 |
| 33          | 97077_f_at  | Rtn3          | Reticulon 3                                                                                                                                                                        | AW213991 |
| 34          | 93839_at    | Rtn3          | Reticulon 3                                                                                                                                                                        | A1854888 |
| 35          | 97876_at    | Vps29         | Vacuolar protein sorting 29 (S. pombe)                                                                                                                                             | A1842008 |
| 36          | 97857_at    | Zdhhc3        | Zinc finger, DHHC domain containing 3                                                                                                                                              | AW047762 |
| 37          | 93984_at    | Atpi          | ATPase inhibitor                                                                                                                                                                   | AF002718 |
| 38          | 101543_f_at | Tuba6         | Tubulin, alpha 6                                                                                                                                                                   | M13441   |
| 39          | 98759_f_at  | Tuba2         | Tubulin, alpha 2                                                                                                                                                                   | M28727   |
| 40          | 95643_at    | Wdr6          | WD repeat domain 6                                                                                                                                                                 | AW050287 |
| 41          | 100343_f_at | Tuba1         | Tubulin, alpha 1                                                                                                                                                                   | M28729   |
| 42          | 97535_at    | Ywhah         | Tyrosine 3-monoxygenase/tryptophan 5-monoxygenase activation protein, eta polypeptide                                                                                              | D87661   |
| 43          | 95758_at    | Scd2          | Stearoyl-Coenzyme A desaturase 2                                                                                                                                                   | M26270   |
| 44          | 100342_i_at | Tuba1         | Tubulin, alpha 1                                                                                                                                                                   | M28729   |
| 45          | 93747_at    | AW742319      | Expressed sequence AW742319                                                                                                                                                        | AW122599 |
| 46          | 93496_at    | Elovl5        | ELOVL family member 5, elongation of long chain fatty acids (yeast)                                                                                                                | A1852098 |
| 47          | 95282_at    | Hspca         | Heat shock protein 1, alpha                                                                                                                                                        | J04633   |
| 48          | 103364_f_at | 5730494M16Rik | RIKEN cDNA 5730494M16 gene                                                                                                                                                         | AW04525  |
| 49          | 98953_at    | 1500010M16Rik | RIKEN cDNA 1500010M16 gene                                                                                                                                                         | AW048032 |
| 50          | 100539_at   | Bach          | Brain acyl-CoA hydrolase                                                                                                                                                           | A1841279 |
| 51          | 97339_at    | ---           | Similar to G protein-coupled receptor kinase-interactor 1; G protein-coupled receptor (LOC216963), mRNA kinase-associated ADP ribosylation factor GTPase-activating protein (GIT1) | A1841159 |
| 52          | 94789_r_at  | Tubb5         | Tubulin, beta 5                                                                                                                                                                    | X04663   |
| 53          | 94788_f_at  | Tubb5         | Tubulin, beta 5                                                                                                                                                                    | X04663   |
| 54          | 97909_at    | Stmn1         | Stathmin 1                                                                                                                                                                         | A1838080 |
| 55          | 93768_f_at  | 2700059D21Rik | RIKEN cDNA 2700059D21 gene                                                                                                                                                         | AW124052 |
| 56          | 103611_at   | Cd47          | CD47 antigen (Rh-related antigen, integrin-associated signal transducer)                                                                                                           | AB012693 |
| 57          | 95020_at    | Cd47          | CD47 antigen (Rh-related antigen, integrin-associated signal transducer)                                                                                                           | A1848868 |
| 58          | 96104_at    | 3732413I11Rik | RIKEN cDNA 3732413I11 gene                                                                                                                                                         | A1047107 |

Bone\_bone marrow

(Cluster c1)  
size: 9

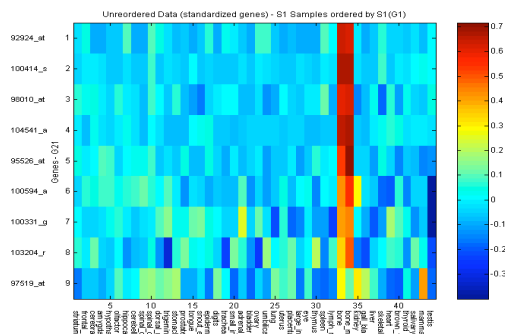

| Probeset ID | Gene symbol | Gene title    | Accession no.                        |          |
|-------------|-------------|---------------|--------------------------------------|----------|
| 1           | 100331_g_at | Prdx2         | Peroxioredoxin 2                     | AF032714 |
| 2           | 100414_s_at | Mpo           | Myeloperoxidase                      | X15313   |
| 3           | 100594_at   | Pigq          | Phosphatidylinositol glycan, class Q | AB008895 |
| 4           | 103204_r_at | 4432406C08Rik | RIKEN cDNA 4432406C08 gene           | AW259499 |
| 5           | 104541_at   | Prtn3         | Proteinase 3                         | U43525   |
| 6           | 92924_at    | Ctsg          | Cathepsin G                          | X70057   |
| 7           | 95526_at    | Xpo7          | Exportin 7                           | A1606243 |
| 8           | 97519_at    | Spp1          | Secreted phosphoprotein 1            | X13986   |
| 9           | 98010_at    | Nfe2          | Nuclear factor, erythroid derived 2  | L09600   |

Bone marrow, bone, lymph node  
spleen, thymus

(Cluster c2)  
size: 12

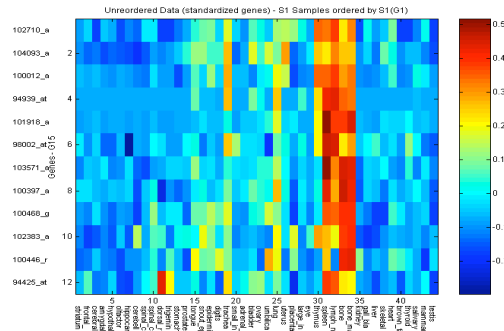

| Probeset ID | Gene symbol | Gene title    | Accession no.                                                                       |          |
|-------------|-------------|---------------|-------------------------------------------------------------------------------------|----------|
| 1           | 100012_at   | Laptm5        | Lysosomal-associated protein transmembrane 5                                        | U29539   |
| 2           | 100397_at   | Tyrobp        | TYRO protein tyrosine kinase binding protein                                        | AF024637 |
| 3           | 100446_r_at | Sprr1b        | Small proline-rich protein 1B                                                       | X91825   |
| 4           | 100468_g_at | Lyl1          | Lymphoblastomic leukemia                                                            | X57687   |
| 5           | 101918_at   | Tgfb1         | Transforming growth factor, beta 1                                                  | AJ009862 |
| 6           | 102383_at   | 5730593F17Rik | RIKEN cDNA 5730593F17 gene                                                          | AW048977 |
| 7           | 102710_at   | Apb1ip        | Amyloid beta (A4) precursor protein-binding, family B, member 1 interacting protein | AF020313 |
| 8           | 103571_at   | Lst1          | Leukocyte specific transcript 1                                                     | U72644   |
| 9           | 104093_at   | Lsp1          | Lymphocyte specific 1                                                               | D49691   |
| 10          | 94425_at    | Ly86          | Lymphocyte antigen 86                                                               | AB007599 |
| 11          | 94939_at    | Cd53          | CD53 antigen                                                                        | X97227   |
| 12          | 98002_at    | Icsbp1        | Interferon consensus sequence binding protein 1                                     | M32489   |

Bone marrow, bone, thymus

(Cluster c3)  
size: 17

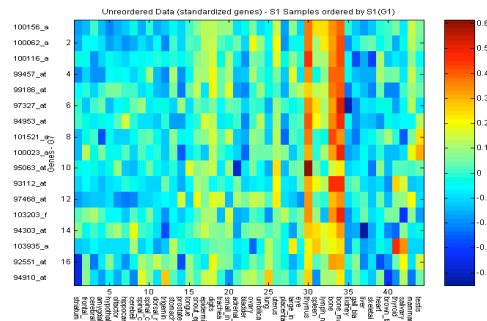

| Probeset ID | Gene symbol | Gene title    | Accession no.                                                                  |           |
|-------------|-------------|---------------|--------------------------------------------------------------------------------|-----------|
| 1           | 100023_at   | Myb12         | Myeloblastosis oncogene-like 2                                                 | X70472    |
| 2           | 100062_at   | Mcm3          | Minichromosome maintenance deficient 3 (S. cerevisiae)                         | X62154    |
| 3           | 100116_at   | 2810417H13Rik | RIKEN cDNA 2810417H13 gene                                                     | A1122538  |
| 4           | 100156_at   | Mcm5          | Minichromosome maintenance deficient 5, cell division cycle 46 (S. cerevisiae) | D26090    |
| 5           | 101521_at   | Birc5         | Baculoviral IAP repeat-containing 5                                            | AB013819  |
| 6           | 103203_f_at | 4432406C08Rik | RIKEN cDNA 4432406C08 gene                                                     | AW259499  |
| 7           | 103935_at   | Atp2a3        | ATPase, Ca++ transporting, ubiquitous                                          | A1504474  |
| 8           | 92551_at    | Lig1          | Ligase I, DNA, ATP-dependent                                                   | U19604    |
| 9           | 93112_at    | Mcm2          | Minichromosome maintenance deficient 2 mitotin (S. cerevisiae)                 | D86725    |
| 10          | 94303_at    | Hnrpd         | Heterogeneous nuclear ribonucleoprotein D                                      | U11274    |
| 11          | 94910_at    | Nde1          | Nuclear distribution gene E homolog 1 (A nidulans)                             | AW120739  |
| 12          | 94953_at    | Racgap1       | Rac GTPase-activating protein 1                                                | AW122347  |
| 13          | 95063_at    | Cdca7         | Cell division cycle associated 7                                               | A1606257  |
| 14          | 97327_at    | Fen1          | Flap structure specific endonuclease 1                                         | L26320    |
| 15          | 97468_at    | Cks1          | CDC28 protein kinase 1                                                         | AB025409  |
| 16          | 99186_at    | Ccna2         | Cyclin A2                                                                      | Cyclin A2 |

Liver, gall bladder, kidney

(Cluster d1)  
size: 7

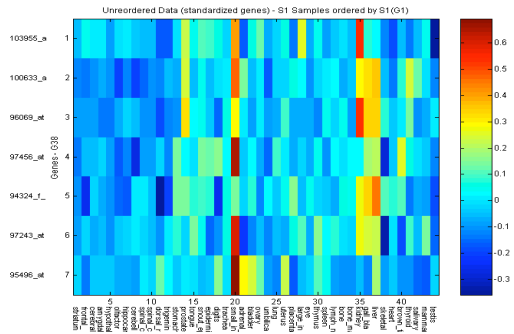

| Probeset ID  | Gene symbol   | Gene title                                                                 | Accession no. |
|--------------|---------------|----------------------------------------------------------------------------|---------------|
| 1 100633_at  | 2810484M10Rik | RIKEN cDNA 2810484M10 gene                                                 | AW124268      |
| 2 103955_at  | Cry11         | Crystallin, lamda 1                                                        | AW050325      |
| 3 94324_f_at | Hmgcl         | 3-hydroxy-3-methylglutaryl-Coenzyme A lyase                                | U49878        |
| 4 95496_at   | 5730409F23Rik | RIKEN cDNA 5730409F23 gene                                                 | AI848866      |
| 5 96069_at   | Akr7a5        | Aldo-keto reductase family 7, member A5 (aflatoxin aldehyde reductase)     | AI840094      |
| 6 97243_at   | Slc9a3r1      | Solute carrier family 9 (sodium/hydrogen exchanger), isoform 3 regulator 1 | U74079        |
| 7 97456_at   | Acsl5         | Acyl-CoA synthetase long-chain family member 5                             | AI838021      |

Liver, gall bladder, kidney

(Cluster d2)  
size: 6

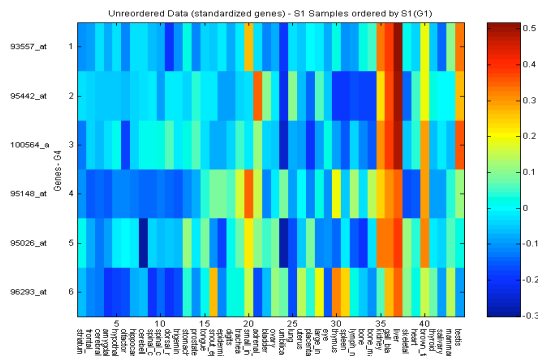

| Probeset ID | Gene symbol   | Gene title                    | Accession no. |
|-------------|---------------|-------------------------------|---------------|
| 1 100564_at | Ddt           | D-dopachrome tautomerase      | AF068199      |
| 2 93557_at  | Sephs2        | Selenophosphate synthetase 2  | U43285        |
| 3 95026_at  | 0610039N19Rik | RIKEN cDNA 0610039N19 gene    | AW047688      |
| 4 95148_at  | Ak2           | Adenylate kinase 2            | AB020202      |
| 5 95442_at  | MGC18837      | Hypothetical protein MGC18837 | AI835706      |
| 6 96293_at  | 2410015N17Rik | RIKEN cDNA 2410015N17 gene    | AI842600      |

Testis

(Cluster e)  
size: 11

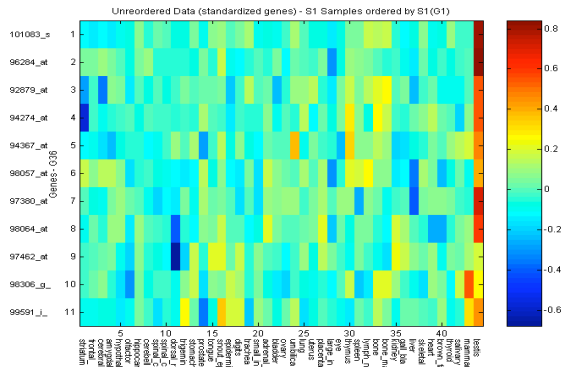

|    | Probeset ID | Gene symbol   | Gene title                                                               | Accession no. |
|----|-------------|---------------|--------------------------------------------------------------------------|---------------|
| 1  | 101083_s_at | Lsm2          | LSM2 homolog, U6 small nuclear RNA associated (S. cerevisiae)            | AF109905      |
| 2  | 92879_at    | Ppm1g         | Protein phosphatase 1G (formerly 2C), magnesium-dependent, gamma isoform | U42383        |
| 3  | 94274_at    | Ube2s         | Ubiquitin-conjugating enzyme E2S                                         | A1837415      |
| 4  | 94367_at    | AA407809      | Expressed sequence AA407809                                              | A1850362      |
| 5  | 96284_at    | Csnk1g2       | Casein kinase 1, gamma 2                                                 | AW121446      |
| 6  | 97380_at    | 1700016A15Rik | RIKEN cDNA 1700016A15 gene                                               | A1197431      |
| 7  | 97462_at    | 3110006P09Rik | RIKEN cDNA 3110006P09 gene                                               | A1847584      |
| 8  | 98057_at    | 1110031E24Rik | RIKEN cDNA 1110031E24 gene                                               | AW121162      |
| 9  | 98064_at    | Aamp          | Angio-associated migratory protein                                       | AW125378      |
| 10 | 98306_g_at  | Foxm1         | Forkhead box M1                                                          | Y11245        |
| 11 | 99591_j_at  | Rdh11         | Retinol dehydrogenase 11                                                 | AB030505      |
