# Supplementary material
Source: PubMed Central journal article supplement (PMC528762)
Supplement: pnas_101_45_16022__2.pdf [file pnas_101_45_16022__2.pdf]

**Table 3. Regulation of expression of normal tissue-specific genes in M1-t-p53 myeloid leukemic cells by wt p53 and IL-6**

**Testis**

(Cluster a)  
size 37

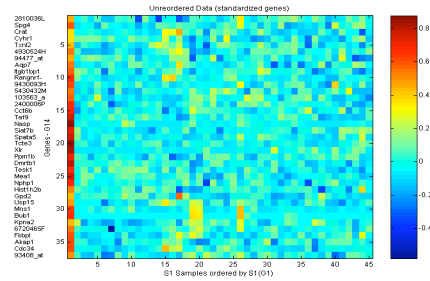

|    | Probeset ID | Gene symbol   | Gene title                                                                            | Accession no. | Regulation by |
|----|-------------|---------------|---------------------------------------------------------------------------------------|---------------|---------------|
| 1  | 100562_at   | Rangnr        | RAN guanine nucleotide release factor                                                 | AI846319      | p53 down      |
| 2  | 100990_g_at | Itgb1bp1      | Integrin beta 1 binding protein 1                                                     | AJ001373      | p53 down      |
| 3  | 101108_at   | Nasp          | Nuclear autoantigenic sperm protein (histone-binding)                                 | AF034610      | p53 down      |
| 4  | 101417_at   | Dmrtb1        | DMRT-like family B with proline-rich C-terminal, 1                                    | AF020191      | IL-6 down     |
| 5  | 101836_at   | Ppm1b         | Protein phosphatase 1B, magnesium dependent, beta isoform                             | D45859        | p53 up        |
| 6  | 101859_at   | Aqp7          | Aquaporin 7                                                                           | AB010100      |               |
| 7  | 102033_at   | Tesk1         | Testis specific protein kinase 1                                                      | AB003494      | p53 down      |
| 8  | 102206_at   | Fkbp1         | FK506 binding protein-like                                                            | AF030001      |               |
| 9  | 103073_i_at | Taf9          | TAF9 RNA polymerase II, TATA box binding protein (TBP)-associated factor              | AI842969      | IL-6 up       |
| 10 | 103343_at   | 5430432M24Rik | RIKEN cDNA 5430432M24 gene                                                            | AI845815      |               |
| 11 | 103467_g_at | Cyhr1         | Cysteine and histidine rich 1                                                         | AA790056      | p53 down      |
| 12 | 103468_at   | Mns1          | Eiosis-specific nuclear structural protein 1                                          | D14849        | p53 down      |
| 13 | 103525_at   | 2810036L13Rik | RIKEN cDNA 2810036L13 gene                                                            | AA981725      |               |
| 14 | 103563_at   | 103563_at     | Mus musculus 10 days neonate olfactory brain cDNA, RIKEN full-length enriched lib     | AW125713      | p53 up        |
| 15 | 103646_at   | Crat          | Carnitine acetyltransferase                                                           | X85983        | p53 down      |
| 16 | 104097_at   | Bub1          | Budding uninhibited by benzimidazoles 1 homolog (S. cerevisiae)                       | AF002823      | IL-6 up       |
| 17 | 92419_at    | Cct6b         | Chaperonin subunit 6b (zeta)                                                          | AB022086      | p53 down      |
| 18 | 92665_f_at  | Xlr           | X-linked lymphocyte-regulated complex                                                 | X07967        | p53 up        |
| 19 | 92790_at    | Kpna2         | Karyopherin (importin) alpha 2                                                        | D55720        | p53 down      |
| 20 | 93408_at    | 93408_at      | Mus musculus transcribed sequences                                                    | AI850482      |               |
| 21 | 93834_at    | Hist1h2bp     | Histone 1, H2bp                                                                       | M25487        | p53 up        |
| 22 | 94048_at    | Cdc34         | Cell division cycle 34 homolog (S. cerevisiae)                                        | AW120683      | p53 up        |
| 23 | 94274_at    | 6720465F12Rik | RIKEN cDNA 6720465F12 gene                                                            | AI837415      | p53 down      |
| 24 | 94387_at    | Spata5        | Spermatogenesis associated 5                                                          | AF016544      |               |
| 25 | 94477_at    | 94477_at      | Mus musculus, clone MGC:6827 IMAGE:2649084, mRNA, complete cds                        | AW123796      | IL-6 down     |
| 26 | 94891_s_at  | Mea1          | Male enhanced antigen 1                                                               | M27938        | p53 down      |
| 27 | 95416_at    | Usp15         | Ubiquitin specific protease 15                                                        | AI642184      |               |
| 28 | 95696_at    | Txnl2         | Thioredoxin-like 2                                                                    | AI840882      | p53 up        |
| 29 | 96106_at    | 2400006P09Rik | RIKEN cDNA 2400006P09 gene                                                            | AW049122      | IL-6 down     |
| 30 | 96263_at    | 4930524H12Rik | RIKEN cDNA 4930524H12 gene                                                            | AW124933      | IL-6 down     |
| 31 | 97369_g_at  | Akap1         | A kinase (PRKA) anchor protein 1                                                      | U95145        |               |
| 32 | 97391_at    | 9430093H08Rik | RIKEN cDNA 9430093H08 gene                                                            | AW012196      | p53 down      |
| 33 | 98428_at    | Spg4          | Spastic paraplegia 4 homolog (human)                                                  | AJ246002      |               |
| 34 | 98614_at    | Nphp1         | Nephronophthisis 1 (juvenile) homolog (human)                                         | AJ243223      | IL-6 up       |
| 35 | 98984_f_at  | Gpd2          | Glycerol phosphate dehydrogenase 2, mitochondrial                                     | D50430        | p53 up        |
| 36 | 99055_at    | Siat7b        | Sialyltransferase 7 ((alpha-N-acetylneuraminyl 2,3-beta-galactosyl-1,3)-N-acetyl gal: | X94000        |               |
| 37 | 99134_at    | Tcte3         | T-complex-associated testis expressed 3                                               | U21673        | p53 up        |

**Skeletal muscle\_heart**

(Cluster b)  
size 29

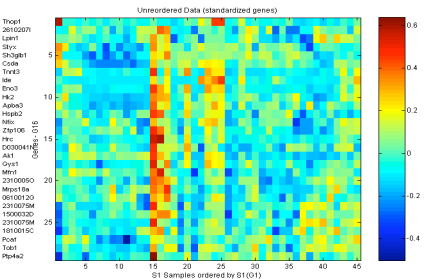

| Probeset ID | Gene symbol | Gene title    | Accession no.                                                   | Regulation by |           |
|-------------|-------------|---------------|-----------------------------------------------------------------|---------------|-----------|
| 1           | 100595_at   | Ptp4a2        | Protein tyrosine phosphatase 4a2                                | AF035644      | p53 up    |
| 2           | 101930_at   | Nfix          | Nuclear factor I/X                                              | Y07688        | p53 down  |
| 3           | 102750_at   | Apba3         | Amyloid beta (A4) precursor protein-binding, family A, member 3 | AF070975      | p53 down  |
| 4           | 103215_g_at | Hspb2         | Heat shock protein 2                                            | AW048883      | p53 up    |
| 5           | 104025_at   | Thop1         | Thimet oligopeptidase 1                                         | AW047185      | p53 down  |
| 6           | 104070_at   | Pcaf          | p300/CBP-associated factor                                      | AW047728      | p53 up    |
| 7           | 104767_f_at | Mrps18a       | Mitochondrial ribosomal protein S18A                            | AW060921      |           |
| 8           | 92371_at    | Hrc           | Histidine rich calcium binding protein                          | AI505355      | p53 up    |
| 9           | 92885_at    | Tnnt3         | Troponin T3, skeletal, fast                                     | L48989        |           |
| 10          | 92888_s_at  | Styx          | Phosphoserine/threonine/tyrosine interaction protein            | U34973        | p53 down  |
| 11          | 94375_at    | Hk2           | Hexokinase 2                                                    | Y11666        | p53 down  |
| 12          | 94380_at    | Ide           | Insulin degrading enzyme                                        | AI852581      | p53 down  |
| 13          | 94531_at    | 2310005O14Rik | RIKEN cDNA 2310005O14 gene                                      | AW124582      | p53 down  |
| 14          | 94870_f_at  | 2310075M17Rik | RIKEN cDNA 2310075M17 gene                                      | AW124226      | p53 down  |
| 15          | 94871_r_at  | 2310075M17Rik | RIKEN cDNA 2310075M17 gene                                      | AW124226      |           |
| 16          | 95518_at    | 1810015C04Rik | RIKEN cDNA 1810015C04 gene                                      | AW122893      | IL-6 down |
| 17          | 95533_at    | Zfp106        | Zinc finger protein 106                                         | AW048037      | p53 up    |
| 18          | 95594_at    | Mfn1          | Mitofusin 1                                                     | AI847486      | p53 up    |
| 19          | 95755_at    | Csda          | Cold shock domain protein A                                     | D14485        |           |
| 20          | 96095_i_at  | 2610207116Rik | RIKEN cDNA 2610207116 gene                                      | AI648018      | p53 up    |
| 21          | 96344_at    | Eno3          | Enolase 3, beta muscle                                          | X61600        | p53 down  |
| 22          | 96801_at    | Ak1           | Adenylate kinase 1                                              | AJ010108      | p53 up    |
| 23          | 97874_at    | 1500032D16Rik | RIKEN cDNA 1500032D16 gene                                      | AI853863      | p53 down  |
| 24          | 98496_at    | Gys1          | Glycogen synthase 1, muscle                                     | U53218        | p53 down  |
| 25          | 98878_r_at  | D030041N15Rik | RIKEN cDNA D030041N15 gene                                      | AW050141      | p53 up    |
| 26          | 98892_at    | Lpin1         | Lipin 1                                                         | AI846934      | p53 up    |
| 27          | 98945_at    | Sh3glb1       | SH3-domain GRB2-like B1 (endophilin)                            | AW125190      | IL-6 up   |
| 28          | 99166_at    | 0610012G03Rik | RIKEN cDNA 0610012G03 gene                                      | AI845963      | IL-6 down |
| 29          | 99532_at    | Tob1          | Transducer of ErbB-2.1                                          | D78382        | p53 up    |

Bone marrow, bone

(Cluster c1)  
size 21

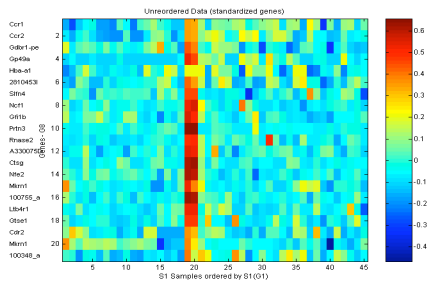

| Probeset ID | Gene symbol | Gene title    | Accession no.                                      | Regulation by |           |
|-------------|-------------|---------------|----------------------------------------------------|---------------|-----------|
| 1           | 100325_at   | Gp49a         | Glycoprotein 49 A                                  | M65027        | IL-6 up   |
| 2           | 100348_at   | 100348_at     | ---                                                | AW214136      | p53 up    |
| 3           | 100755_at   | 100755_at     | ---                                                | U04962        | p53 down  |
| 4           | 101069_g_at | Mkrm1         | Makorin, ring finger protein, 1                    | AA656621      | p53 up    |
| 5           | 101070_at   | Mkrm1         | Makorin, ring finger protein, 1                    | AW125438      | p53 up    |
| 6           | 102260_at   | Gfi1b         | Growth factor independent 1B                       | AF017275      | p53 down  |
| 7           | 103240_f_at | Rnase2        | Ribonuclease, RNase A family, 2                    | AF017258      | IL-6 down |
| 8           | 103266_at   | Ltb4r1        | Leukotriene B4 receptor 1                          | AF044030      | p53 up    |
| 9           | 103270_at   | Gtse1         | G two S phase expressed protein 1                  | AJ222580      | p53 up    |
| 10          | 104393_at   | 2810453I06Rik | RIKEN cDNA 2810453I06 gene                         | AI843571      | p53 down  |
| 11          | 104541_at   | Ptn3          | Proteinase 3                                       | U43525        | p53 down  |
| 12          | 92315_at    | Sfn4          | Schlafen 4                                         | AF099977      | p53 up    |
| 13          | 92924_at    | Ctsg          | Cathepsin G                                        | X70057        | p53 down  |
| 14          | 93094_at    | Cdr2          | Cerebellar degeneration-related 2                  | U88588        | p53 down  |
| 15          | 93397_at    | Ccr2          | Chemokine (C-C) receptor 2                         | U56819        | IL-6 up   |
| 16          | 94781_at    | Hba-a1        | Hemoglobin alpha, adult chain 1                    | V00714        | p53 up    |
| 17          | 95303_at    | A330075D07    | Hypothetical protein A330075D07                    | AA144469      | IL-6 up   |
| 18          | 97407_at    | Gdbr1-pending | Putative glioblastoma cell differentiation-related | AI848025      |           |
| 19          | 97763_at    | Ncf1          | Neutrophil cytosolic factor 1                      | AB002663      | p53 down  |
| 20          | 98010_at    | Nfe2          | Nuclear factor, erythroid derived 2                | L09600        | p53 down  |
| 21          | 99413_at    | Ccr1          | Chemokine (C-C motif) receptor 1                   | U29678        | IL-6 up   |

Bone marrow, bone, spleen, thymus, lymph node, trachea, adipose

(Cluster c2)  
size 47

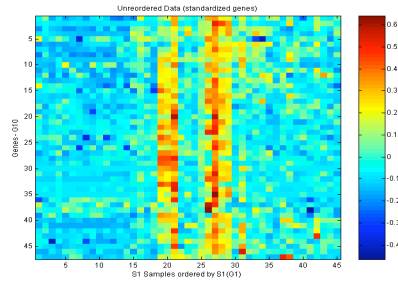

|    | Probeset ID | Gene symbol   | Gene title                                                                          | Accession no. | Regulation by |
|----|-------------|---------------|-------------------------------------------------------------------------------------|---------------|---------------|
| 1  | 100328_s_at | Pira3         | Paired-Ig-like receptor A3                                                          | U96684        | IL-6 up       |
| 2  | 100468_g_at | Lyl1          | Lymphoblastic leukemia                                                              | X57687        | p53 down      |
| 3  | 100511_at   | 6330406L22Rik | RIKEN cDNA 6330406L22 gene                                                          | AI154249      | p53 down      |
| 4  | 101019_at   | Ctsc          | Cathepsin C                                                                         | U74683        | p53 down      |
| 5  | 101048_at   | Ptpcr         | Protein tyrosine phosphatase, receptor type, C                                      | M14343        | IL-6 up       |
| 6  | 101753_s_at | Lzp-s         | P lysozyme structural                                                               | X51547        | p53 down      |
| 7  | 101918_at   | Tgfb1         | Transforming growth factor, beta 1                                                  | AJ009862      | p53 down      |
| 8  | 102021_at   | Il4ra         | Interleukin 4 receptor, alpha                                                       | M27960        | IL-6 up       |
| 9  | 102064_at   | Casp1         | Caspase 1                                                                           | L28095        | IL-6 up       |
| 10 | 102104_f_at | Ms4a6b        | Membrane-spanning 4-domains, subfamily A, member 6B                                 | AI504305      | p53 down      |
| 11 | 102318_at   | Siat8d        | Sialyltransferase 8 (alpha-2, 8-sialyltransferase) D                                | X86000        | p53 down      |
| 12 | 102353_at   | Itgb2         | Integrin beta 2                                                                     | M31039        | p53 up        |
| 13 | 102397_at   | Cbfa2t3h      | Core-binding factor, runt domain, alpha subunit 2; translocated to, 3 homolog (huma | AF038029      | p53 down      |
| 14 | 102791_at   | Psmb8         | Proteasome (prosome, macropain) subunit, beta type 8 (large multifunctional protea  | U22033        | p53 down      |
| 15 | 102851_s_at | Hcph          | Hemopoietic cell phosphatase                                                        | M68902        | p53 down      |
| 16 | 102884_at   | Inpp5d        | Inositol polyphosphate-5-phosphatase D                                              | U51742        | p53 down      |
| 17 | 102906_at   | Tgtp          | T-cell specific GTPase                                                              | L38444        | IL-6 up       |
| 18 | 102914_s_at | 102914_s_at   | ---                                                                                 | U23778        | p53 up        |
| 19 | 103035_at   | Tap1          | Transporter 1, ATP-binding cassette, sub-family B (MDR/TAP)                         | U60020        | p53 up        |
| 20 | 103408_at   | AI325941      | Expressed sequence AI325941                                                         | AI007117      | p53 up        |
| 21 | 103571_at   | Lst1          | Leukocyte specific transcript 1                                                     | U72644        | p53 down      |
| 22 | 103579_at   | Rac2          | RAS-related C3 botulinum substrate 2                                                | X53247        | p53 down      |
| 23 | 103629_g_at | Lef1          | Lymphoid enhancer binding factor 1                                                  | D16503        |               |
| 24 | 103662_at   | Ncf4          | Neutrophil cytosolic factor 4                                                       | U59488        | p53 down      |
| 25 | 104173_at   | Ms4a1         | Membrane-spanning 4-domains, subfamily A, member 1                                  | AA797989      | IL-6 up       |
| 26 | 104257_g_at | Pscdbp        | Pleckstrin homology, Sec7 and coiled-coil domains, binding protein                  | AI120844      | IL-6 up       |
| 27 | 104639_i_at | 4930553M18Rik | RIKEN cDNA 4930553M18 gene                                                          | AI464596      | p53 up        |
| 28 | 104750_at   | Ifi47         | Interferon gamma inducible protein                                                  | M63630        | p53 down      |
| 29 | 92356_at    | Ptpn8         | Protein tyrosine phosphatase, non-receptor type 8                                   | M90388        | p53 up        |
| 30 | 92483_g_at  | Fmnl          | Formin-like                                                                         | AF006466      | p53 down      |
| 31 | 92668_at    | Btk           | Bruton agammaglobulinemia tyrosine kinase                                           | L10627        | p53 down      |
| 32 | 92832_at    | Socs1         | Suppressor of cytokine signaling 1                                                  | U88325        | IL-6 up       |
| 33 | 93085_at    | Psmb9         | Proteasome (prosome, macropain) subunit, beta type 9 (large multifunctional protea  | D44456        | p53 down      |
| 34 | 93086_at    | Igk-V8        | Immunoglobulin kappa chain variable 8 (V8)                                          | M18237        |               |
| 35 | 93321_at    | Ifi203        | Interferon activated gene 203                                                       | AF022371      | p53 down      |
| 36 | 93583_s_at  | Igh-6         | Immunoglobulin heavy chain 6 (heavy chain of IgM)                                   | V00817        | p53 down      |
| 37 | 93584_at    | Igh-6         | Immunoglobulin heavy chain 6 (heavy chain of IgM)                                   | V00821        | p53 down      |
| 38 | 93680_at    | Stk10         | Serine/threonine kinase 10                                                          | D89728        | p53 down      |
| 39 | 93869_s_at  | 93869_s_at    |                                                                                     | U23781        | p53 up        |
| 40 | 94224_s_at  | Ifi205        | Interferon activated gene 205                                                       | M74123        | p53 down      |
| 41 | 94939_at    | Cd53          | CD53 antigen                                                                        | X97227        | IL-6 up       |
| 42 | 96752_at    | Icam1         | Intercellular adhesion molecule                                                     | M90551        | p53 up        |
| 43 | 97963_at    | Sipa1         | Signal-induced proliferation associated gene 1                                      | D11374        | p53 down      |
| 44 | 98002_at    | Icsbp1        | Interferon consensus sequence binding protein 1                                     | M32489        | p53 down      |
| 45 | 98406_at    | Ccl5          | Chemokine (C-C motif) ligand 5                                                      | AF065947      | p53 down      |
| 46 | 98465_f_at  | Ifi204        | Interferon activated gene 204                                                       | M31419        | p53 down      |
| 47 | 99030_at    | Il7r          | Interleukin 7 receptor                                                              | M29697        | IL-6 down     |

Liver, gall bladder, kidney

(Cluster d)  
size 24

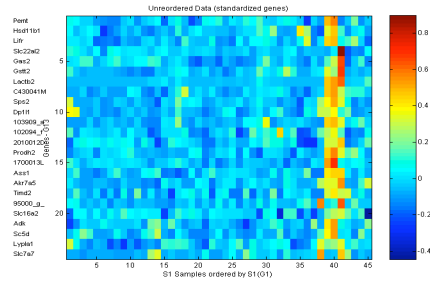

|    | Probeset ID | Gene symbol   | Gene title                                                                     | Accession no. | Regulation by |
|----|-------------|---------------|--------------------------------------------------------------------------------|---------------|---------------|
| 1  | 100491_at   | Slc16a2       | Solute carrier family 16 (monocarboxylic acid transporters), member 2          | AF045692      | IL-6 down     |
| 2  | 101946_at   | Lypl1         | Lysophospholipase 1                                                            | AA840463      | p53 up        |
| 3  | 102094_f_at | 102094_f_at   | ---                                                                            | A1841270      | IL-6 down     |
| 4  | 102429_at   | Slc22a2       | Solute carrier family 22 (organic cation transporter)-like 2                   | AB005451      |               |
| 5  | 102768_i_at | Sc5d          | Sterol-C5-desaturase (fungal ERG3, delta-5-desaturase) homolog (S. cerevisiae) | AB016248      | IL-6 up       |
| 6  | 103391_at   | C430041M20    | Hypothetical protein C430041M20                                                | A988033       |               |
| 7  | 103452_at   | Prodh2        | Proline dehydrogenase (oxidase) 2                                              | AA675075      |               |
| 8  | 103818_at   | Slc7a7        | Solute carrier family 7 (cationic amino acid transporter, y+ system), member 7 | AJ012754      | p53 down      |
| 9  | 103909_at   | 103909_at     | Mus musculus copper chaperone for superoxide dismutase, mRNA (cDNA clone M     | XA1839702     | p53 up        |
| 10 | 104603_at   | Gstt2         | Glutathione S-transferase, theta 2                                             | X98056        | p53 down      |
| 11 | 104659_g_at | Lifr          | Leukemia inhibitory factor receptor                                            | D17444        | IL-6 up       |
| 12 | 104726_at   | 1700013L23Rik | RIKEN cDNA 1700013L23 gene                                                     | AA670737      | IL-6 down     |
| 13 | 93512_f_at  | Adk           | Adenosine kinase                                                               | AW121801      | p53 down      |
| 14 | 93557_at    | Sps2          | Selenophosphate synthetase 2                                                   | U43285        | p53 down      |
| 15 | 94338_g_at  | Gas2          | Growth arrest specific 2                                                       | M21828        | p53 up        |
| 16 | 94987_at    | Pemt          | Phosphatidylethanolamine N-methyltransferase                                   | U25051        |               |
| 17 | 95000_g_at  | 95000_g_at    | Mus Musculus mRNA for hypothetical protein                                     | AJ010338      | p53 up        |
| 18 | 96069_at    | Akr7a5        | Aldo-keto reductase family 7, member A5 (aflatoxin aldehyde reductase)         | A1840094      | p53 down      |
| 19 | 96134_at    | Dp111         | Deleted in polyposis 1-like 1                                                  | AA755260      | p53 down      |
| 20 | 96231_at    | 2010012D11Rik | RIKEN cDNA 2010012D11 gene                                                     | AW123780      | IL-6 down     |
| 21 | 97257_at    | Lactb2        | Lactamase, beta 2                                                              | AW122766      | p53 up        |
| 22 | 97335_at    | Timd2         | T-cell immunoglobulin and mucin domain containing 2                            | AA795198      | IL-6 down     |
| 23 | 97521_at    | Ass1          | Argininosuccinate synthetase 1                                                 | M31690        | p53 up        |
| 24 | 97867_at    | Hsd11b1       | Hydroxysteroid 11-beta dehydrogenase 1                                         | X83202        | IL-6 up       |

Digits, epidermis,  
snout, epidermis

(Cluster e)  
size 7

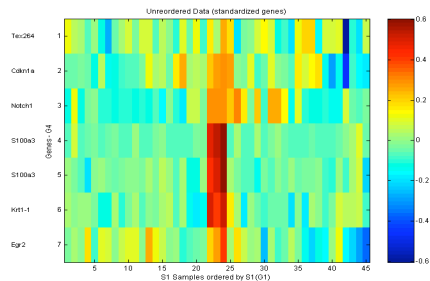

|   | Probeset ID | Gene symbol | Gene title                                 | Accession no. | Regulation by |
|---|-------------|-------------|--------------------------------------------|---------------|---------------|
| 1 | 101051_at   | S100a3      | S100 calcium binding protein A3            | AF004941      | p53 up        |
| 2 | 101052_g_at | S100a3      | S100 calcium binding protein A3            | AF004941      | p53 up        |
| 3 | 102661_at   | Egr2        | Early growth response 2                    | M24377        | IL-6 up       |
| 4 | 103558_at   | Krt1-1      | Keratin complex 1, acidic, gene 1          | M27734        | p53 up        |
| 5 | 94226_at    | Tex264      | Testis expressed gene 264                  | AW048306      | IL-6 down     |
| 6 | 97497_at    | Notch1      | Notch gene homolog 1 (Drosophila)          | Z11886        | p53 up        |
| 7 | 98067_at    | Cdkn1a      | Cyclin-dependent kinase inhibitor 1A (P21) | U09507        | p53 up        |

Neuronal tissues

(Cluster f)  
size 39

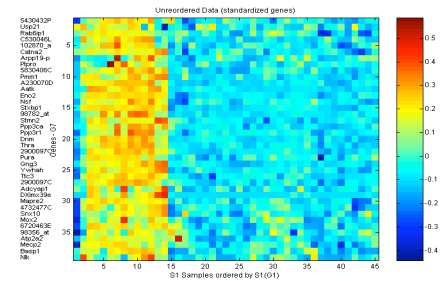

|    | Probeset ID | Gene symbol    | Gene title                                                                         | Accession no. | Regulation by |
|----|-------------|----------------|------------------------------------------------------------------------------------|---------------|---------------|
| 1  | 100427_at   | Ptpro          | Protein tyrosine phosphatase, receptor type, O                                     | U37465        | p53 up        |
| 2  | 100994_at   | Aatk           | Apoptosis-associated tyrosine kinase                                               | AF011908      |               |
| 3  | 101851_at   | Mox2           | Antigen identified by monoclonal antibody MRC OX-2                                 | AF029215      |               |
| 4  | 101929_at   | 6720463E02Rik  | RIKEN cDNA 6720463E02 gene                                                         | AI836322      | IL-6 down     |
| 5  | 102037_at   | Mapre2         | Microtubule-associated protein, RP/EB family, member 2                             | AI844269      | IL-6 down     |
| 6  | 102342_at   | Nsf            | N-ethylmaleimide sensitive fusion protein                                          | U10120        |               |
| 7  | 102870_at   | 102870_at      | Mus musculus adult male hippocampus cDNA, RIKEN full-length enriched library, cl   | AW125272      | p53 up        |
| 8  | 102912_at   | 5430432P15Rik  | RIKEN cDNA 5430432P15 gene                                                         | AI265115      | p53 up        |
| 9  | 103031_g_at | Dnm            | Dynamin                                                                            | L31397        | p53 up        |
| 10 | 103223_at   | 5830406C15Rik  | RIKEN cDNA 5830406C15 gene                                                         | AW120767      | p53 up        |
| 11 | 103501_at   | Pura           | Purine rich element binding protein A                                              | U02098        | p53 up        |
| 12 | 104108_at   | Rab6ip1        | Rab6 interacting protein 1                                                         | AJ245569      | p53 up        |
| 13 | 92200_at    | Adcyap1        | Adenylate cyclase activating polypeptide 1                                         | AB010149      | p53 up        |
| 14 | 92228_at    | Catna2         | Catenin alpha 2                                                                    | D25282        | p53 up        |
| 15 | 92348_at    | Thra           | Thyroid hormone receptor alpha                                                     | AI841022      | p53 up        |
| 16 | 93147_f_at  | A230070D14Rik  | RIKEN cDNA A230070D14 gene                                                         | AI839880      | p53 up        |
| 17 | 93360_at    | Pmm1           | Phosphomannomutase 1                                                               | AF007267      | p53 up        |
| 18 | 93935_at    | Nlk            | Nemo like kinase                                                                   | AF036332      | p53 up        |
| 19 | 94556_at    | Snx10          | Sorting nexin 10                                                                   | AI746846      | IL-6 up       |
| 20 | 94986_at    | Gng3           | Guanine nucleotide binding protein (G protein), gamma 3 subunit                    | AF069953      |               |
| 21 | 95027_at    | Usp21          | Ubiquitin specific protease 21                                                     | AW050342      | IL-6 down     |
| 22 | 95092_at    | Ppp3ca         | Protein phosphatase 3, catalytic subunit, alpha isoform                            | J05479        | p53 up        |
| 23 | 95669_g_at  | Stmn2          | Stathmin-like 2                                                                    | AI840972      | IL-6 down     |
| 24 | 95673_s_at  | Basp1          | Brain abundant, membrane attached signal protein 1                                 | AW124113      | p53 up        |
| 25 | 95848_at    | 2900097C17Rik  | RIKEN cDNA 2900097C17 gene                                                         | C76063        | p53 up        |
| 26 | 96165_at    | 4732477C12Rik  | RIKEN cDNA 4732477C12 gene                                                         | AW125109      | p53 up        |
| 27 | 96299_at    | 2900097C17Rik  | RIKEN cDNA 2900097C17 gene                                                         | AI847298      | p53 up        |
| 28 | 97260_at    | Arpp19-pending | Cyclic AMP phosphoprotein                                                          | AW121489      |               |
| 29 | 97341_at    | DXlmx39e       | DNA segment, Chr X, Immunex 39, expressed                                          | AW124082      |               |
| 30 | 97535_at    | Ywhah          | Tyrosine 3-monooxygenase/tryptophan 5-monooxygenase activation protein, eta po     | D87661        | p53 down      |
| 31 | 97710_f_at  | C530046L02Rik  | RIKEN cDNA C530046L02 gene                                                         | AI425990      | p53 up        |
| 32 | 97983_s_at  | Stxbp1         | Syntaxin binding protein 1                                                         | D45903        | p53 down      |
| 33 | 98356_at    | 98356_at       | Mus musculus transcribed sequences                                                 | AW125421      | IL-6 down     |
| 34 | 98555_at    | Ttc3           | Tetrapeptide repeat domain 3                                                       | AB008516      | p53 down      |
| 35 | 98782_at    | 98782_at       | Mus musculus, clone IMAGE:6544937, mRNA                                            | D38613        |               |
| 36 | 99045_at    | Eno2           | Enolase 2, gamma neuronal                                                          | AC002397      | p53 up        |
| 37 | 99183_at    | Ppp3r1         | Protein phosphatase 3, regulatory subunit B, alpha isoform (calcineurin B, type I) | AW123013      | p53 up        |
| 38 | 99465_at    | Mecp2          | Methyl CpG binding protein 2                                                       | AJ132922      | p53 up        |
| 39 | 99570_s_at  | Atp2a2         | ATPase, Ca++ transporting, cardiac muscle, slow twitch 2                           | AF029982      |               |

tissues order:

- 1 testis
- 2 eye
- 3 spinal\_cord\_upper
- 4 spinal\_cord\_lower
- 5 cerebellum
- 6 olfactory\_bulb
- 7 striatum
- 8 hypothalamus
- 9 hippocampus
- 10 frontal\_corte
- 11 cerebral\_cortex
- 12 amygdala

|    |                      |
|----|----------------------|
| 13 | trigeminal           |
| 14 | dorsal_root_ganglion |
| 15 | skeletal_muscle      |
| 16 | heart                |
| 17 | brown_fat            |
| 18 | stomach              |
| 19 | bone_marrow          |
| 20 | bone                 |
| 21 | spleen               |
| 22 | digits               |
| 23 | epidermis            |
| 24 | snout_epidermis      |
| 25 | tongue               |
| 26 | thymus               |
| 27 | lymph_node           |
| 28 | trachea              |
| 29 | adipose              |
| 30 | adrenal_gland        |
| 31 | lung                 |
| 32 | bladder              |
| 33 | uterus               |
| 34 | ovary                |
| 35 | umbilical_cord       |
| 36 | placenta             |
| 37 | large_intestine      |
| 38 | small_intestine      |
| 39 | gall_bladder         |
| 40 | liver                |
| 41 | kidney               |
| 42 | mammary_gland        |
| 43 | salivary_gland       |
| 44 | thyroid              |
| 45 | prostate             |
