# Supplementary material
Source: PubMed Central journal article supplement (PMC528762)
Supplement: pnas_101_45_16022__3.pdf [file pnas_101_45_16022__3.pdf]

**Table 4. Regulation of expression of normal tissue-specific genes in M1-t-p53 myeloid leukemic cells by WT p53 and TG**

**Neuronal tissues**

(Cluster a)  
size 16

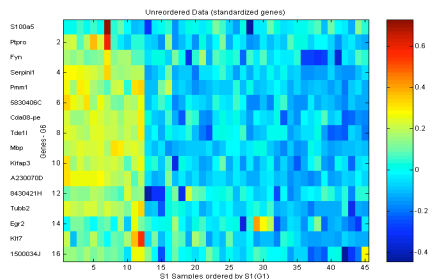

|    | Probeset ID | Gene symbol   | Gene title                                                   | Accession no. | Regulation by |
|----|-------------|---------------|--------------------------------------------------------------|---------------|---------------|
| 1  | 100113_s_at | Kifap3        | Kinesin-associated protein 3                                 | D50367        | TG up         |
| 2  | 100133_at   | Fyn           | Fyn proto-oncogene                                           | M27266        | TG up         |
| 3  | 100427_at   | Ptpro         | Protein tyrosine phosphatase, receptor type, O               | U37465        | p53 up        |
| 4  | 102225_at   | 8430421H08Rik | RIKEN cDNA 8430421H08 gene                                   | AA163268      | TG up         |
| 5  | 102661_at   | Egr2          | Early growth response 2                                      | M24377        | TG up         |
| 6  | 103223_at   | 5830406C15Rik | RIKEN cDNA 5830406C15 gene                                   | AW120767      | p53 up        |
| 7  | 104645_at   | Klf7          | Kruppel-like factor 7 (ubiquitous)                           | AI853712      | p53 up        |
| 8  | 93147_f_at  | A230070D14Rik | RIKEN cDNA A230070D14 gene                                   | AI839880      | p53 up        |
| 9  | 93360_at    | Pmm1          | Phosphomannomutase 1                                         | AF007267      | p53 up        |
| 10 | 93530_at    | Cda08-pending | T-cell immunomodulatory protein                              | AI842807      | TG up         |
| 11 | 94835_f_at  | Tubb2         | Tubulin, beta 2                                              | M28739        | p53 up        |
| 12 | 95101_at    | Tde1l         | Tumor differentially expressed 1, like                       | AI834772      | TG up         |
| 13 | 95301_at    | S100a5        | S100 calcium binding protein A5                              | AF087469      | TG up         |
| 14 | 96311_at    | Mbp           | Myelin basic protein                                         | M11533        | p53 up        |
| 15 | 97404_at    | 1500034J01Rik | RIKEN cDNA 1500034J01 gene                                   | AW048244      | p53 up        |
| 16 | 99494_at    | Serpini1      | Serine (or cysteine) proteinase inhibitor, clade I, member 1 | AJ001700      | TG up         |

**Bone marrow, bone, spleen, thymus, lymph node, trachea, adipose**

(Cluster b)  
size 10

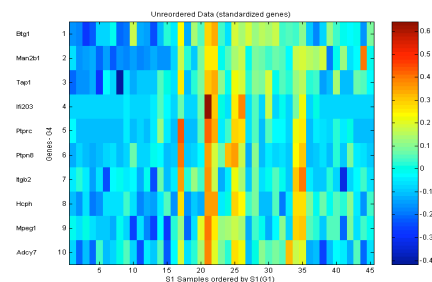

|    | Probeset ID | Gene symbol | Gene title                                                  | Accession no. | Regulation by      |
|----|-------------|-------------|-------------------------------------------------------------|---------------|--------------------|
| 1  | 101048_at   | Ptprc       | Protein tyrosine phosphatase, receptor type, C              | M14343        | TG up              |
| 2  | 102353_at   | Itgb2       | Integrin beta 2                                             | M31039        | p53 up             |
| 3  | 102851_s_at | Hcph        | Hemopoietic cell phosphatase                                | M68902        | p53 down but TG up |
| 4  | 103035_at   | Tap1        | Transporter 1, ATP-binding cassette, sub-family B (MDR/TAP) | U60020        | p53 up             |
| 5  | 103392_at   | Adcy7       | Adenylate cyclase 7                                         | U12919        | TG up              |
| 6  | 92356_at    | Ptprb       | Protein tyrosine phosphatase, non-receptor type 8           | M90388        | p53 up             |
| 7  | 93104_at    | Btg1        | B-cell translocation gene 1, anti-proliferative             | Z16410        | p53 up             |
| 8  | 93321_at    | Ifi203      | Interferon activated gene 203                               | AF022371      |                    |
| 9  | 99071_at    | Mpeg1       | Macrophage expressed gene 1                                 | L20315        | TG up              |
| 10 | 99562_at    | Man2b1      | Mannosidase 2, alpha B1                                     | U87240        | p53 up             |

**Bone, bone marrow, some in thymus**

(Cluster c)  
size 11

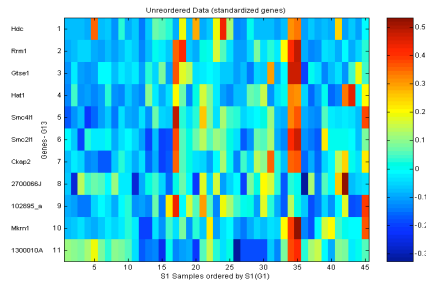

|    | Probeset ID | Gene symbol   | Gene title                                                    | Accession no. | Regulation by |
|----|-------------|---------------|---------------------------------------------------------------|---------------|---------------|
| 1  | 100612_at   | Rrm1          | Ribonucleotide reductase M1                                   | K02927        | p53 up        |
| 2  | 101069_g_at | Mkm1          | Makorin, ring finger protein, 1                               | AA656621      | p53 up        |
| 3  | 101906_at   | Smc41         | SMC4 structural maintenance of chromosomes 4-like 1 (yeast)   | AA032310      | TG up         |
| 4  | 102895_at   | 102895_at     | Mus musculus cDNA clone MGC:67586 IMAGE:6406279, complete cds | AI153246      | p53 up        |
| 5  | 103270_at   | Gtse1         | G two S phase expressed protein 1                             | AJ222580      | p53 up        |
| 6  | 104322_at   | Ckap2         | Cytoskeleton associated protein 2                             | AI121796      | p53 up        |
| 7  | 104398_at   | 1300010A20Rik | RIKEN cDNA 1300010A20 gene                                    | AI846222      | TG up         |
| 8  | 104470_at   | 2700066J21Rik | RIKEN cDNA 2700066J21 gene                                    | AI957346      | p53 up        |
| 9  | 93328_at    | Hdc           | Histidine decarboxylase                                       | X57437        | TG up         |
| 10 | 97421_at    | Smc21         | SMC2 structural maintenance of chromosomes 2-like 1 (yeast)   | U42385        | p53 up        |
| 11 | 97895_f_at  | Hat1          | Histidine aminotransferase 1                                  | AW125218      | TG up         |

**Skeletal muscle, heart**

(Cluster d)  
size 7

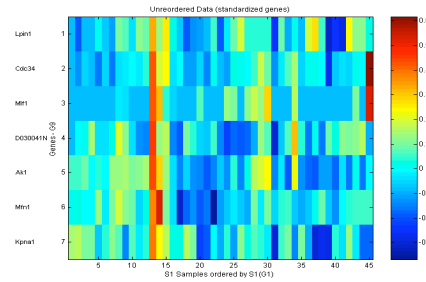

|   | Probeset ID | Gene symbol   | Gene title                                     | Accession no. | Regulation by |
|---|-------------|---------------|------------------------------------------------|---------------|---------------|
| 1 | 101370_at   | Kpna1         | Karyopherin (importin) alpha 1                 | U20619        | TG up         |
| 2 | 102061_at   | Mif1          | Myeloid leukemia factor 1                      | AF100171      | TG up         |
| 3 | 94048_at    | Cdc34         | Cell division cycle 34 homolog (S. cerevisiae) | AW120683      | p53 up        |
| 4 | 95594_at    | Mfn1          | Mitofusin 1                                    | AI847486      | p53 up        |
| 5 | 96801_at    | Ak1           | Adenylate kinase 1                             | AJ010108      | p53 up        |
| 6 | 98878_r_at  | D030041N15Rik | RIKEN cDNA D030041N15 gene                     | AW050141      | p53 up        |
| 7 | 98892_at    | Lpin1         | Lipin 1                                        | AI846934      | p53 up        |

**Testis**

(Cluster e)  
size 4

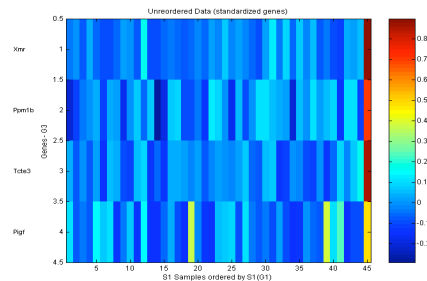

|   | Probeset ID | Gene symbol | Gene title                                                | Accession no. | Regulation by |
|---|-------------|-------------|-----------------------------------------------------------|---------------|---------------|
| 1 | 101466_at   | Pigf        | Phosphatidylinositol glycan, class F                      | D50264        | p53 up        |
| 2 | 101836_at   | Ppm1b       | Protein phosphatase 1B, magnesium dependent, beta isoform | D45859        | p53 up        |
| 3 | 102818_at   | Xmr         | Xlr-related, meiosis regulated                            | X72697        | TG up         |
| 4 | 99134_at    | Tcte3       | T-complex-associated testis expressed 3                   | U21673        | p53 up        |

mainly Liver, gall bladder

(Cluster f)  
size 4

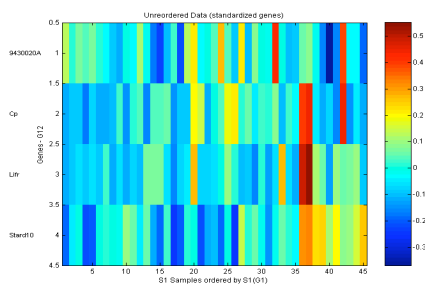

|   | Probeset ID | Gene symbol   | Gene title                          | Accession no. | Regulation by |
|---|-------------|---------------|-------------------------------------|---------------|---------------|
| 1 | 102381_at   | 9430020A05Rik | RIKEN cDNA 9430020A05 gene          | AA619207      | TG up         |
| 2 | 104658_at   | Lifr          | Leukemia inhibitory factor receptor | D17444        | TG up         |
| 3 | 92851_at    | Cp            | Ceruloplasmin                       | U49430        | TG up         |
| 4 | 96735_at    | Stard10       | START domain containing 10          | AW049732      | p53 up        |

**tissues ordered:**

- 1 amygdala
- 2 cerebral\_cortex
- 3 frontal\_corte
- 4 hippocampus
- 5 hypothalamus
- 6 striatum
- 7 olfactory\_bulb
- 8 spinal\_cord\_upper
- 9 spinal\_cord\_lower
- 10 cerebellum
- 11 trigeminal
- 12 dorsal\_root\_ganglion
- 13 skeletal\_muscle
- 14 heart
- 15 brown\_fat
- 16 eye
- 17 thymus
- 18 umbilical\_cord
- 19 bladder
- 20 lung
- 21 lymph\_node
- 22 spleen
- 23 uterus
- 24 ovary
- 25 trachea
- 26 adipose
- 27 prostate
- 28 tongue
- 29 snout\_epidermis
- 30 epidermis
- 31 digits
- 32 adrenal\_gland
- 33 placenta

|    |                 |
|----|-----------------|
| 34 | bone            |
| 35 | bone_marrow     |
| 36 | gall_bladder    |
| 37 | liver           |
| 38 | kidney          |
| 39 | large_intestine |
| 40 | small_intestine |
| 41 | stomach         |
| 42 | mammary_gland   |
| 43 | salivary_gland  |
| 44 | thyroid         |
| 45 | testis          |
